# Supplementary material
Source: PubMed Central journal article supplement (PMC3675175)

## **SUPPLEMENTAL MATERIAL**

### **Online Appendices**

## Online Appendix 1

Full parameterization of the third model which includes all stroke survivors, stroke decedents and stroke-free cohort members during follow-up

*Average Memory Score=*

*$\beta_0$ (representing average memory score for a 75 year old in the reference category who remained stroke-free throughout follow-up)*

*+  $\beta_1$ \*Indicator for whether ever survived a stroke (1 if yes, 0 for individuals who had a stroke but did not survive or individuals who remained stroke-free)*

*+ $\beta_2$ \* Years before stroke onset among stroke survivors (# years, or 0 for individuals who have already survived a stroke, or individuals who had a stroke but did not survive or individuals who remained stroke-free)*

*+ $\beta_3$ \* Indicator variable for whether already survived a stroke (1 if yes, or 0 for individuals who have not yet had a stroke or individuals who remained stroke-free)*

*+ $\beta_4$ \* Years after survived stroke (# years, or 0 for individuals who have not yet had a stroke or individuals who remained stroke-free)*

*+ $\beta_5$ \*Indicator for whether ever had a stroke and did not survive(1 if yes, or 0 if survived a stroke or remained stroke free)*

*+ $\beta_6$ \*Years before stroke which was not survived (# years or 0 if survived a stroke or remained stroke free)*

*+ $\beta_7$ \*Age at stroke centered at 75 years (age in years, or 0 if remained stroke free)*

*+ $\beta_8$ \*Age at each interview centered at 75 years (age for people who remained stroke free; 0 if had a stroke)*

*+ $\beta_i$ \*Other baseline covariates*

## Online Appendix 2:

Appendix Figure 1: Trajectory of memory score for all participants who survived for at least 2 years after stroke.

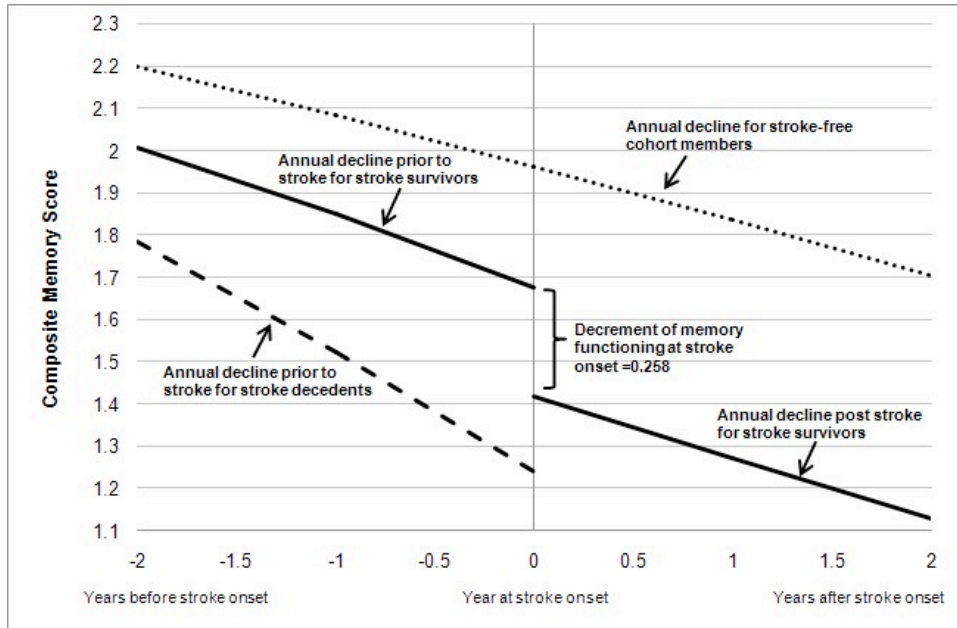

Appendix Figure 2: Trajectory of memory score for all participants who survived for at least 3 years after stroke.

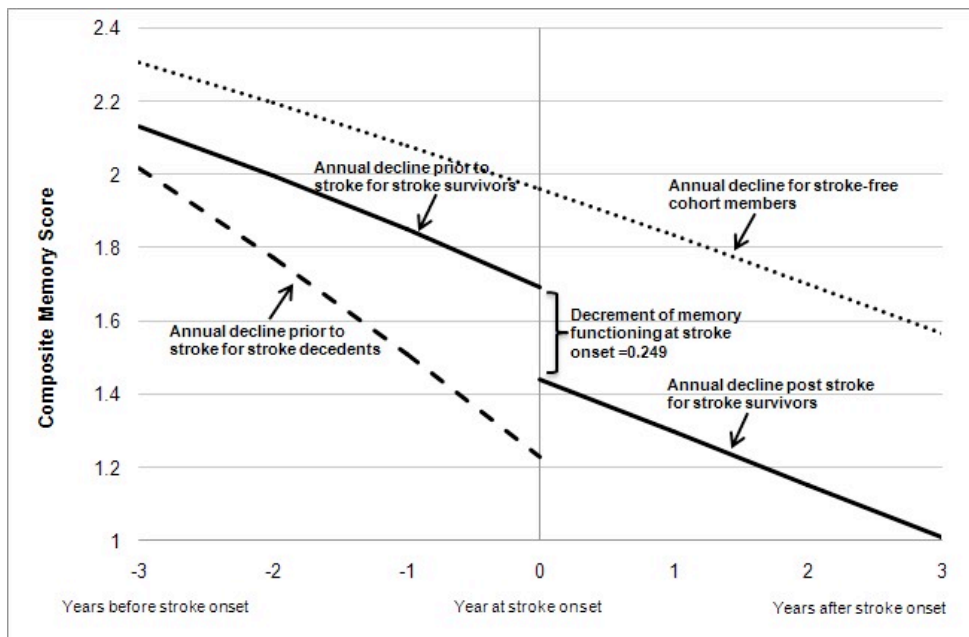

Appendix Figure 3: Trajectory of memory score for all participants who survived for at least 4 years after stroke.

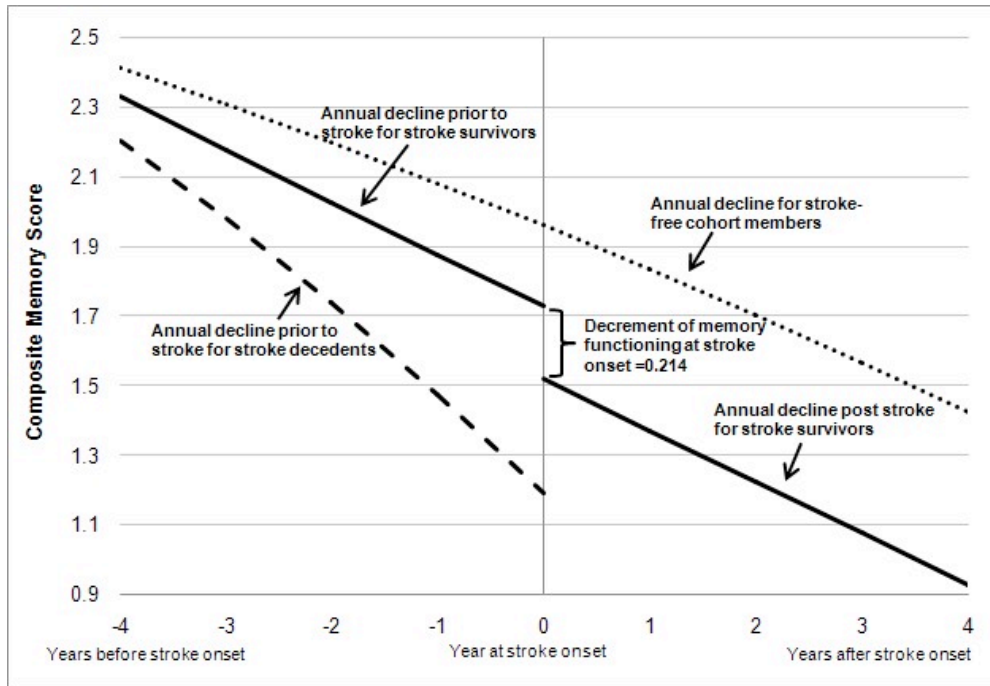

### Online Appendix 3:

Appendix Figure 4: Trajectory of the 25<sup>th</sup> percentile of memory score among all participants

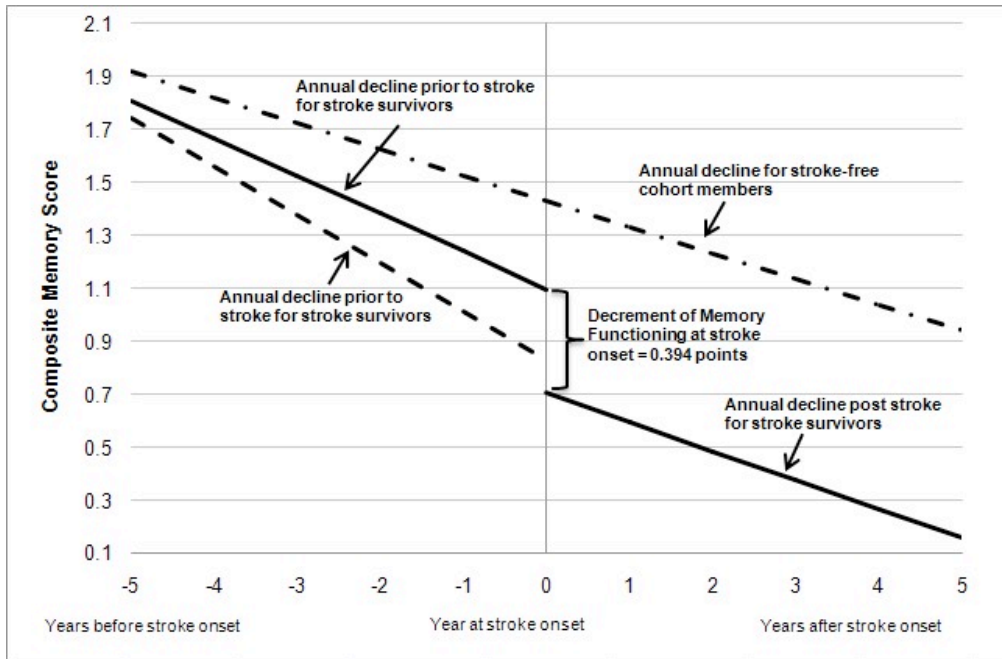

Appendix Figure 5: Trajectory of the 50<sup>th</sup> percentile of memory score among all participants

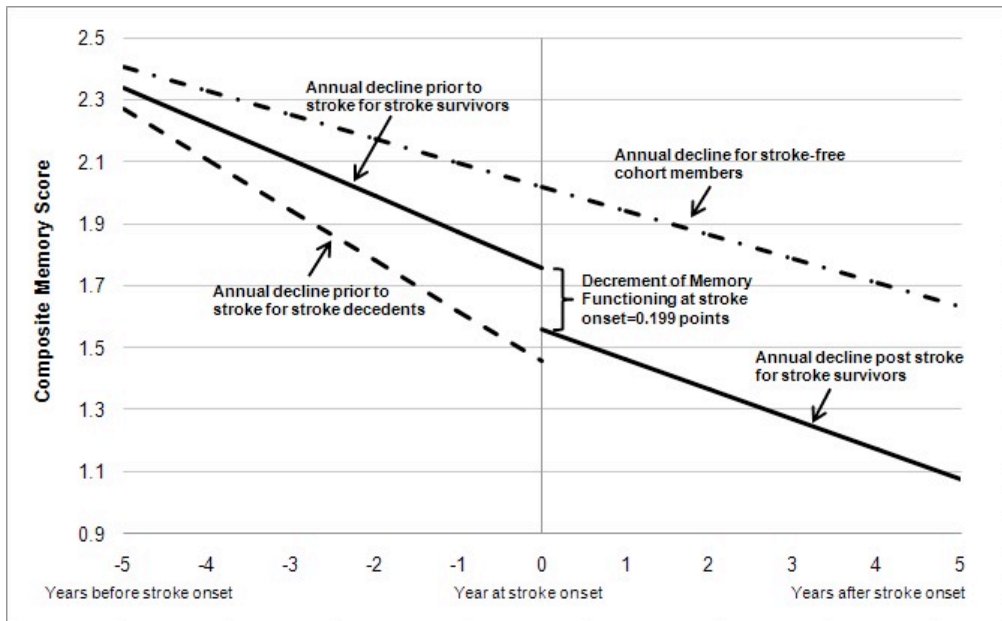

Appendix Figure 6: Trajectory of the 75<sup>th</sup> percentile of memory score among all participants

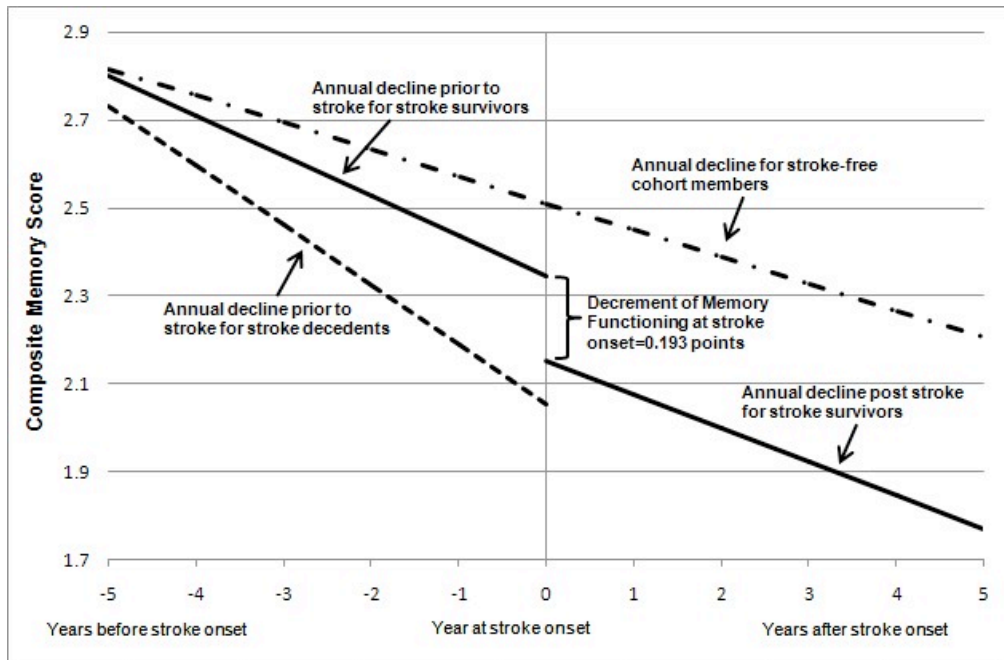

### Online Appendix 4:

Appendix figure 7. Trajectory of memory score for all participants whose stroke date is not imputed

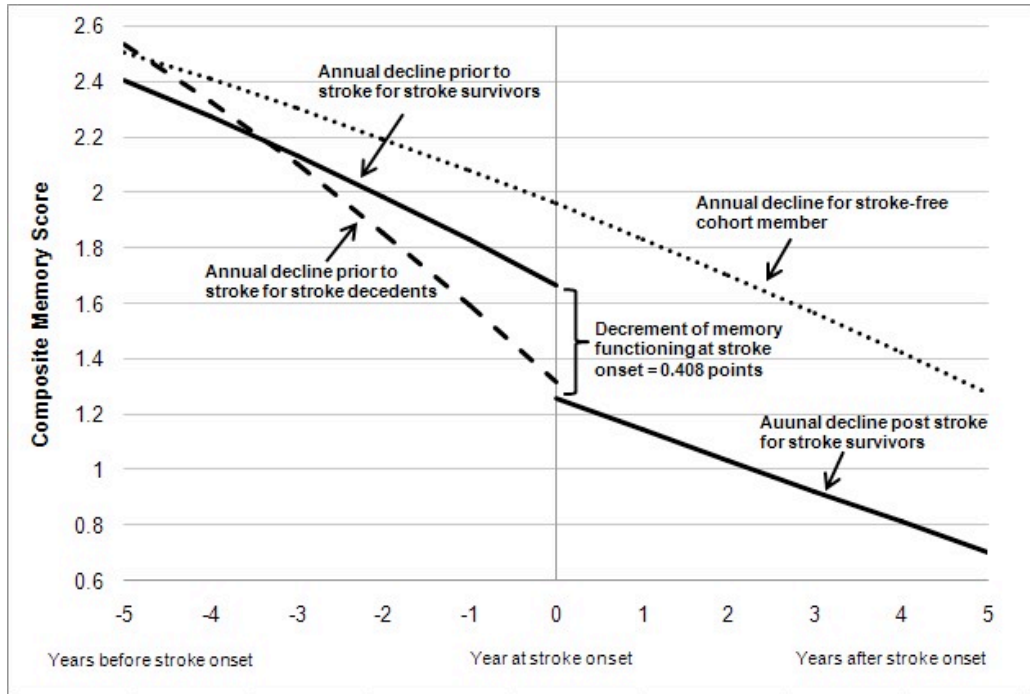

Supplement: NIHMS403926-supplement-1.pdf [file NIHMS403926-supplement-1.pdf]
